# Supplementary material
Source: publisher figshare collection journal article supplement (https://frontiersin.figshare.com/ndownloader/files/20223951)
Supplement: Supplementary file [file 20223951]

## Supplementary Material

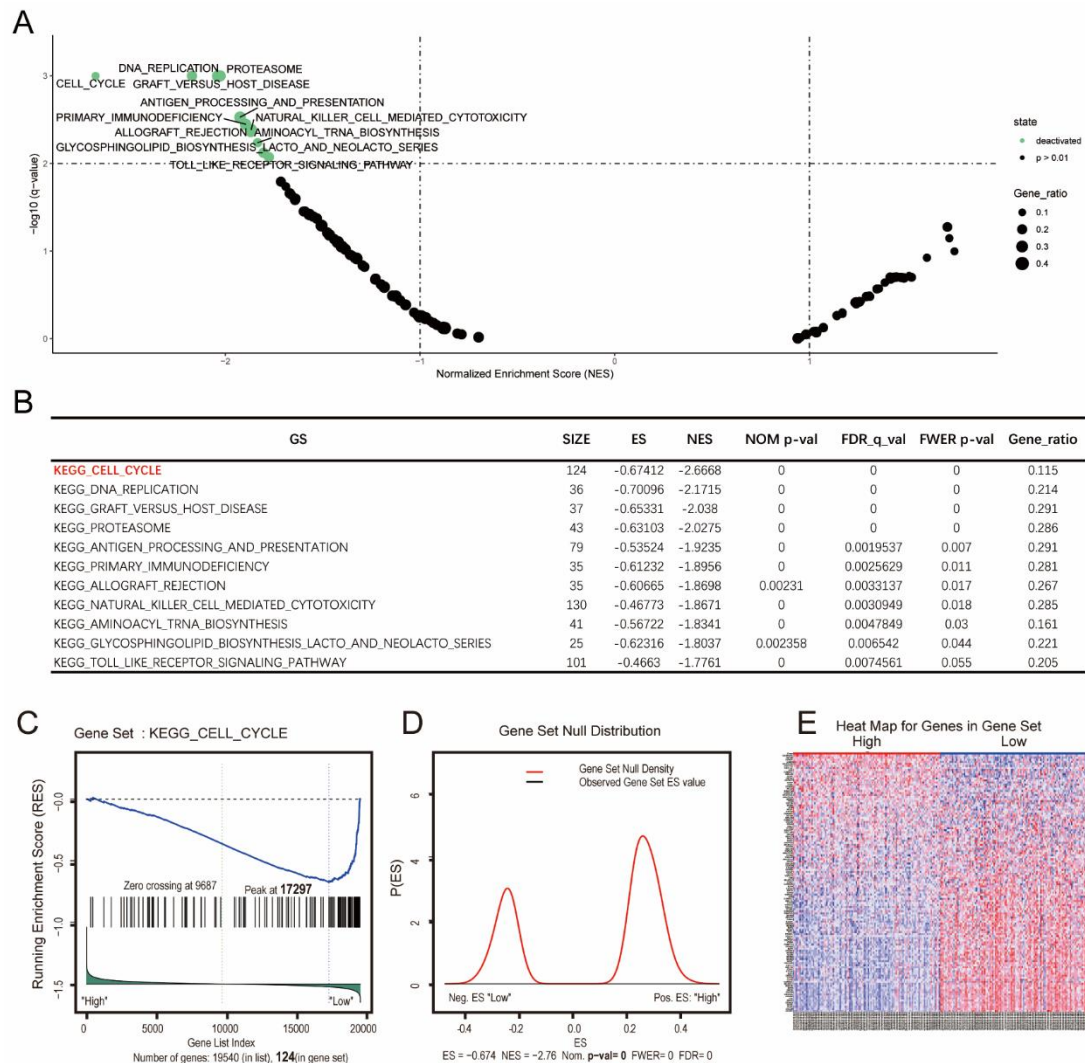

**Supplementary Figure S1.** Annotation of LINC00993 by GSEA. (A). Volcano plot for enriched KEGG gene sets for LINC00993 GSEA (FDR\_q\_val < 0.01). (B). Detailed information table for enriched gene sets of KEGG analysis. GS: Gene Sets. ES: Enrichment score. NES: Normalized enrichment score. NOM p-val: Nominal p-value (from the null distribution of the gene set). FDR q-val: False discovery rate q-values. FWER p-val: Family wise error rate p-values. (C) Enrichment score plot for gene set KEGG\_CELL\_CYCLE. (D) Gene set null distribution was drew by doing a 1000 times permutation. Permutations were done by reshuffling gene labels each time. (E) Heat map for genes in gene set KEGG\_CELL\_CYCLE.

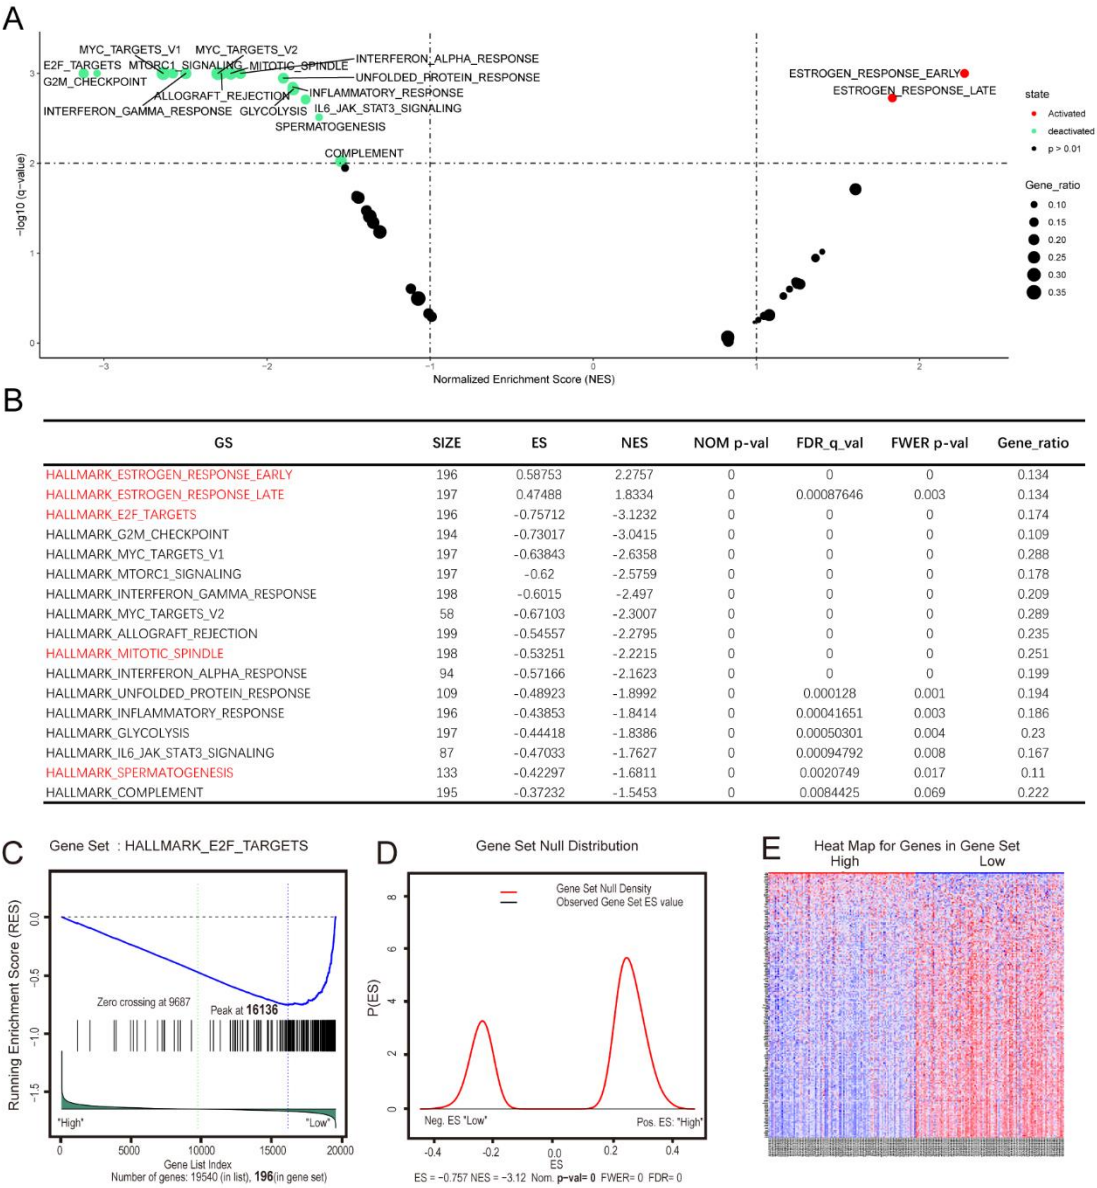

**Supplementary Figure S2.** GSEA results of Hallmarks gene sets analysis of LINC00993 in breast cancer. (A) Volcano plot for enriched Hallmarks gene sets for LINC00993 GSEA (FDR<sub>q\_val</sub> < 0.01). (B) Detailed information table for enriched gene sets of Hallmarks analysis. (C) Enrichment score plot for gene set HALLMARK\_E2F\_TARGETS. (D) Gene set null distribution was drew by doing a 1000 times permutation. Permutations were done by reshuffling gene labels each time. (E)Heat map for genes in gene set HALLMARK\_E2F\_TARGETS.

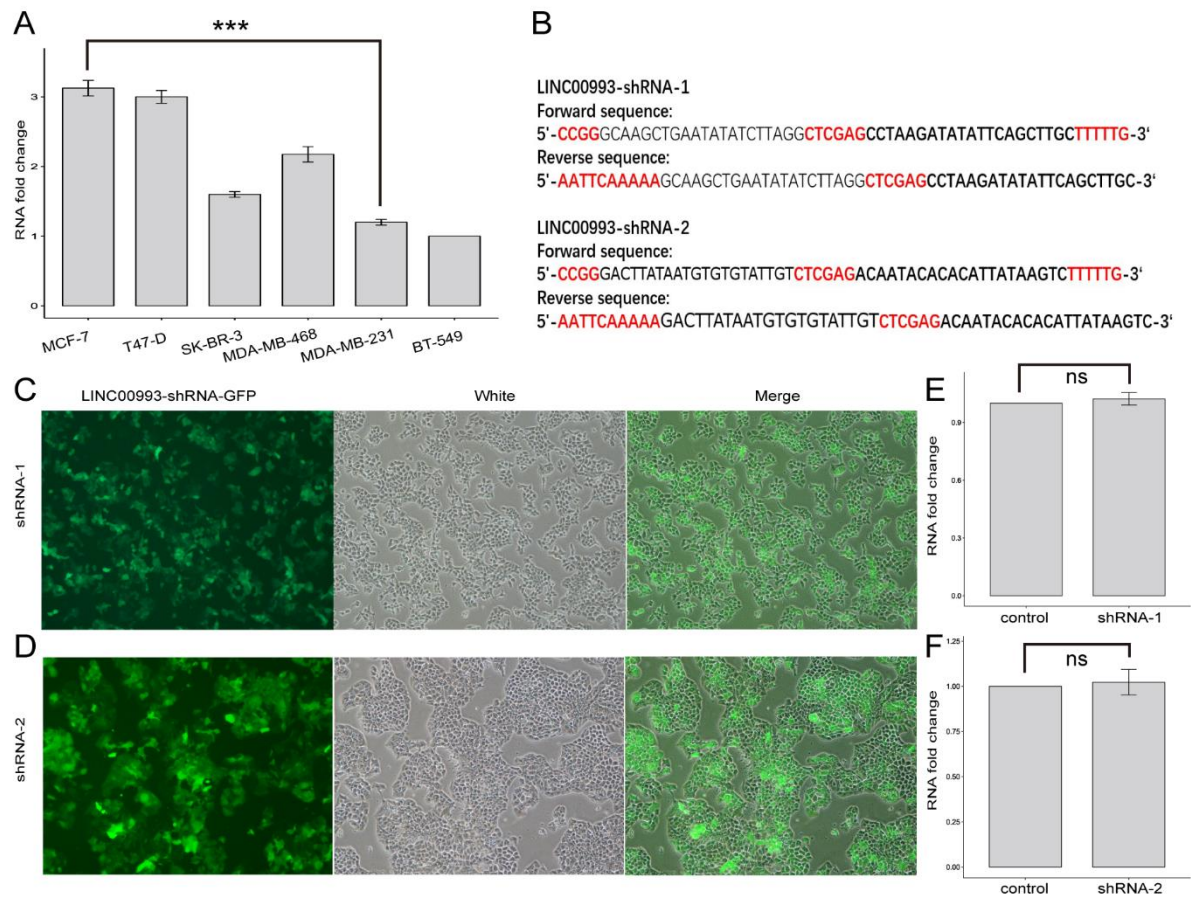

**Supplementary Figure S3.** Cell line for the experiment. (A) Bar plot showing the expression of LINC000993 in different breast cell lines detected by qRT-PCR. (B) Sequence information of two different shRNAs. Forward and Reverse primers were listed (C-D) shRNA lentivirus infection efficiency showed by Fluorescence microscope in MCF-7 cells. (E-F) Expression of LINC00993 detected by qRT-PCR in different shRNA infected MCF-7 cell lines. ns: not significant, \*\*\*P < 0.001 based on Student's t-test.

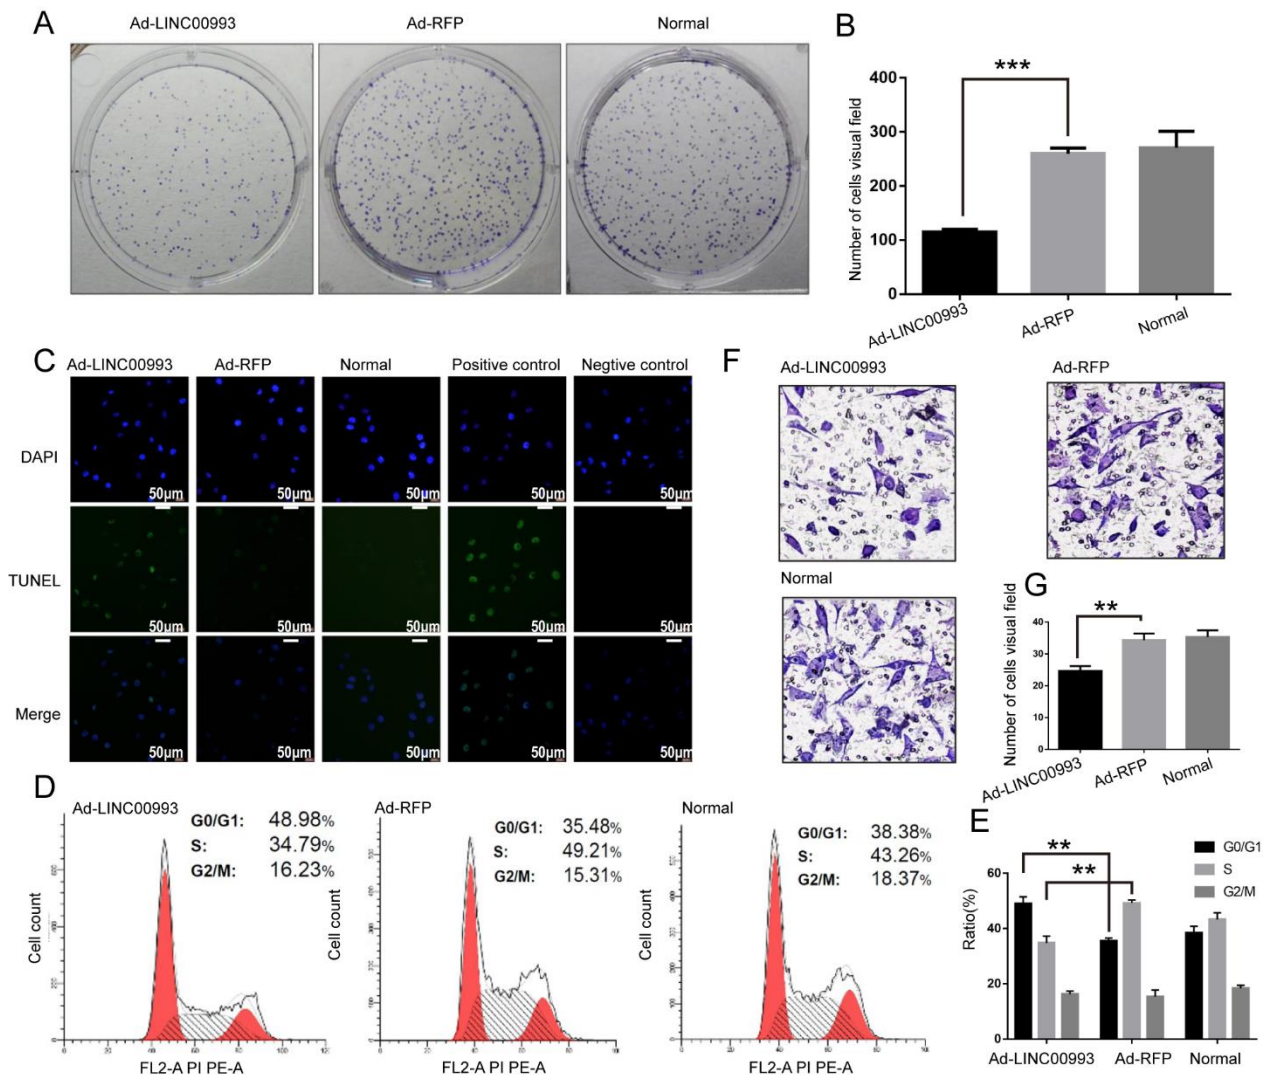

**Supplementary Figure S4.** LINC00993 suppress the growth of TNBC cells in vitro. (A).Image of clone formation assay. (B). Number of clones were counted 2 weeks after plantation. (C). LINC00993 expression caused apoptosis shown by TUNEL assay. Green points reflected apoptosis, and we used DAPI to stain DNA. Positive control are cells treated with DNase I, negative control are cells collected without adding TUNEL reaction buffer. Original magnification,  $\times 100$ . Scale bars,  $50\mu\text{m}$ . (D) Effect of LINC00993 on cell cycle detected by flow cytometry. (E) Flow cytometry cell cycle results shown in bar plot. (F).Invasive ability tested by transwell assay. 20000 cells were plated each well, cells were observed after 24 hours of incubation. (G). Bar plot for number of cells migrated across the membrane. \*\*  $P < 0.01$ , \*\*\*  $P < 0.001$ , based on Student's t-test. Data were present in  $M \pm \text{SEM}$ .



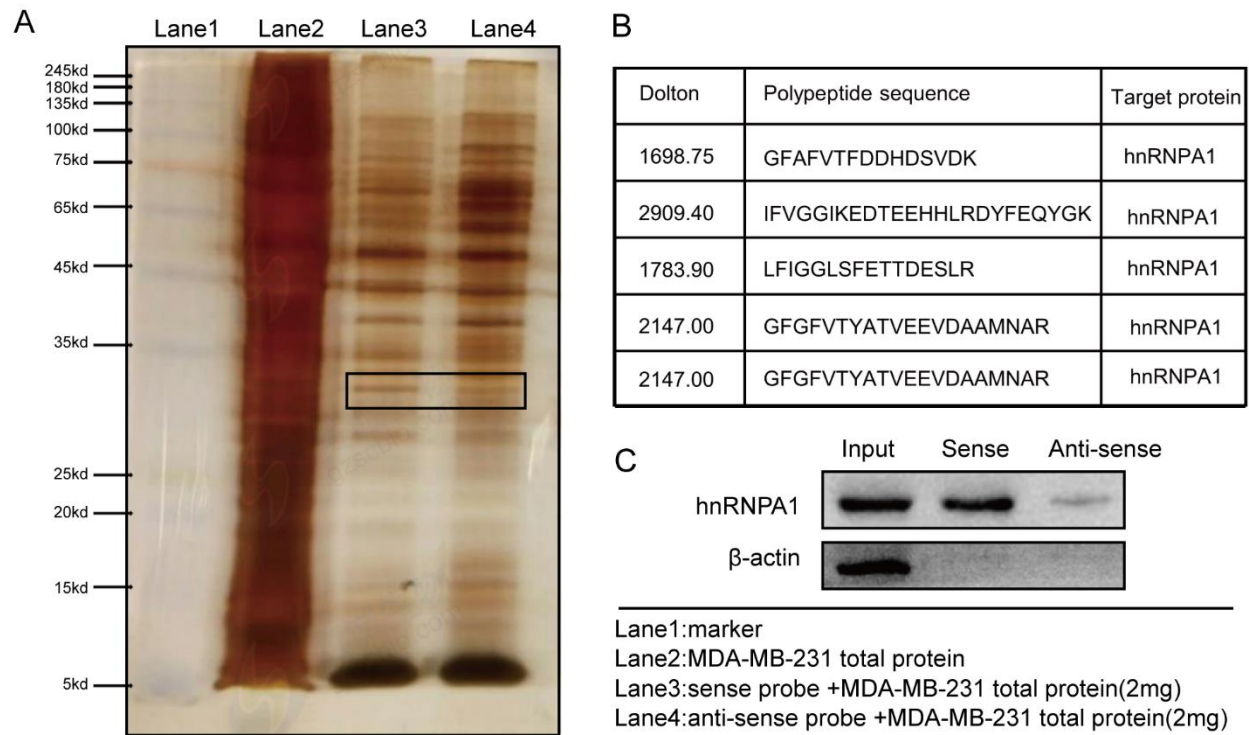

**Supplementary Figure S5.** Identification of hnRNPA1 as a Binding Partner for LINC00993. (A). SDS-PAGE analysis of proteins purified from in vitro binding assay using biotinylated LINC00993 or antisense control RNA and MDA-MB-231 protein extracts. The highlighted protein band was subjected to mass spectrometry analysis. (B). Table shows the detected polypeptide sequences from the subjected band by mass spectrometry analysis. (C). Western blot confirms LINC00993 and hnRNPA1 interaction.
